# Supplementary material
Source: PubMed Central journal article supplement (PMC3203788)
Supplement: 1109209108_pnas.201109209SI.pdf [file 1109209108_pnas.201109209SI.pdf]

# Supporting Information

Peng and Chen 10.1073/pnas.1109209108

## SI Materials and Methods

**BAC Clones and Mammalian Expression Plasmids.** BAC clones used in chromosomal conformation capture (3C) assays are listed in Table S3. All were purchased from BACPAC Resource Center (<http://bacpac.chori.org/>). The human cone-rod homeobox (CRX) expression vector *hCRX-pcDNA3.1/HisC* and its parent vector were described previously (1).

**Mouse Strains.** C57BL/6J (WT) and nuclear receptor subfamily 2, group E, member 3 (NR2E3)-deficient *rd7* mice (*Nr2e3<sup>rd7/rd7</sup>*) were purchased from The Jackson Laboratory. Neural retina leucine zipper (*Nrl*) knockout (*Nrl<sup>-/-</sup>*) mice were provided by Anand Swaroop (University of Michigan, Ann Arbor, MI). *Crx* knockout (*Crx<sup>-/-</sup>*) mice were a gift from Constance Cepko (Harvard University, Boston, MA). All mice were used in accordance with a protocol approved by the Washington University Animal Care and Use Committee and conforming with the guidelines for animal use of the Association for Research in Vision and Ophthalmology (*Policies*, [www.arvo.org](http://www.arvo.org)).

**Human Retinas.** Normal human retina samples from 31- and 34-year-old male cadaver donors were kindly provided by David Beebe (Washington University). Each retina was dissected into three subregions enriched for rods [far periphery (FP)], cones [macula lutea (ML)], or mixed rods/cones [peripheral macula lutea (PML)], respectively.

**3C assays.** 3C assays on mouse or human retinas were performed based on a protocol described by Hagège et al. (2). Briefly, dissected retinas were digested with 2% collagenase (C0130; Sigma) to make single-cell suspensions. Aliquots containing  $1 \times 10^7$  cells were treated with 2% formaldehyde in 10% (vol/vol) FBS/PBS for 10 min to crosslink interacting chromatin segments. The samples were lysed in cell lysis buffer [10 mM Tris-HCl (pH 7.5), 10 mM NaCl, 5 mM MgCl<sub>2</sub>, 0.1 mM EGTA, and 1× complete protease inhibitor (11836153001; Roche)] for 10 min on ice. The nuclei were collected by centrifugation at  $400 \times g$  for 5 min and digested with 300–400 U of Bpm1 (R0565L; New England Biolabs) at 37 °C overnight. For positive controls, 10 µg of BAC clone containing each gene of interest were also digested by Bpm1. The resulting nuclei preparation and BAC-positive control DNA were treated with 100 U of T4 ligase (M0202S; New England Biolabs) at 16 °C for 4 h. After decrosslinking and DNA purification, 3C samples and controls were diluted 10-fold

and analyzed by PCR. 3C PCR primers and sequence primers used for validating human *L/M* 3C products are listed in Tables S1 and S2. Predicted 3C PCR product sizes in base pairs are listed in Table S4. Quantitative PCR (qPCR) was performed with SYBR Green Jumpstart Taq ReadyMix qPCR Kit (S4438; Sigma) on a CFX96 Real-Time PCR System (Bio-Rad) according to the manufacturers' protocols. Looping frequencies were calculated as ratios ( $\times 100$ ) relative to a constant DNA control using Fc/Rc primers located within the same Bpm1 restriction fragment (percentage Fc/Rc). Error bars represent the SEM from three independent experiments ( $n = 3$ ).

**Quantitative RT-PCR (qRT-PCR) assays.** qRT-PCR assays were performed essentially as described by Peng and Chen (1) with  $\beta$ -actin as a reference. Relative mRNA levels normalized to  $\beta$ -actin were determined and presented as fold changes relative to the WT values. Error bars represent the SEM from three independent experiments ( $n = 3$ ), and statistical significance was determined by using the paired Student's *t* test. All of the RT-PCR primers were described previously (1, 3).

**ChIP assays.** ChIP assays were performed with six pooled retinas of each mouse strain at age postnatal day 14 (P14) following the procedure described by Peng and Chen (3). Immunoprecipitation (IP) was carried out with 1 µg of a rabbit antibody to CRX (p261) (4), NR2E3 (p183) (5), or NRL (AB 5693; Chemicon) and normal rabbit IgG (Santa Cruz Biotechnology) as a baseline control. The immunoprecipitated DNA, input (without IP), and mock (without chromatin DNA) controls were analyzed by qPCR using primers spanning various regions of each murine *opsin* gene (Figs. 1A, 2A, and 3A). The results are presented as ratios of IP vs. input  $\times 100$  (percentage input) after normalization with the IgG control values. Error bars represent the SEM from three independent experiments ( $n = 3$ ). Primer sets for genes are listed in Table S5.

**Y79 cell cultures and transient transfection.** Y79 cell cultures and transient transfection were performed as described previously by Peng and Chen (1). Four micrograms of *hCRX-pcDNA 3.1/HisC* (+CRX) or its empty vector *pcDNA 3.1/HisC* (–CRX) were transfected into Y79 cells cultured to 50–60% confluence on 100-mm plates. Over 50% transfection efficiency was achieved with DreamFect transfection reagent (Boca Scientific). 3C assays were performed at 48 h after transfection.

1. Peng GH, Chen S (2007) Crx activates *opsin* transcription by recruiting HAT-containing co-activators and promoting histone acetylation. *Hum Mol Genet* 16:2433–2452.
2. Hagège H, et al. (2007) Quantitative analysis of chromosome conformation capture assays (3C-qPCR). *Nat Protoc* 2:1722–1733.
3. Peng GH, Chen S (2005) Chromatin immunoprecipitation identifies photoreceptor transcription factor targets in mouse models of retinal degeneration: New findings and challenges. *Vis Neurosci* 22:575–586.

4. La Spada AR, et al. (2001) Polyglutamine-expanded ataxin-7 antagonizes CRX function and induces cone-rod dystrophy in a mouse model of SCA7. *Neuron* 31:913–927.
5. Peng GH, Ahmad O, Ahmad F, Liu J, Chen S (2005) The photoreceptor-specific nuclear receptor Nr2e3 interacts with Crx and exerts opposing effects on the transcription of rod versus cone genes. *Hum Mol Genet* 14:747–764.

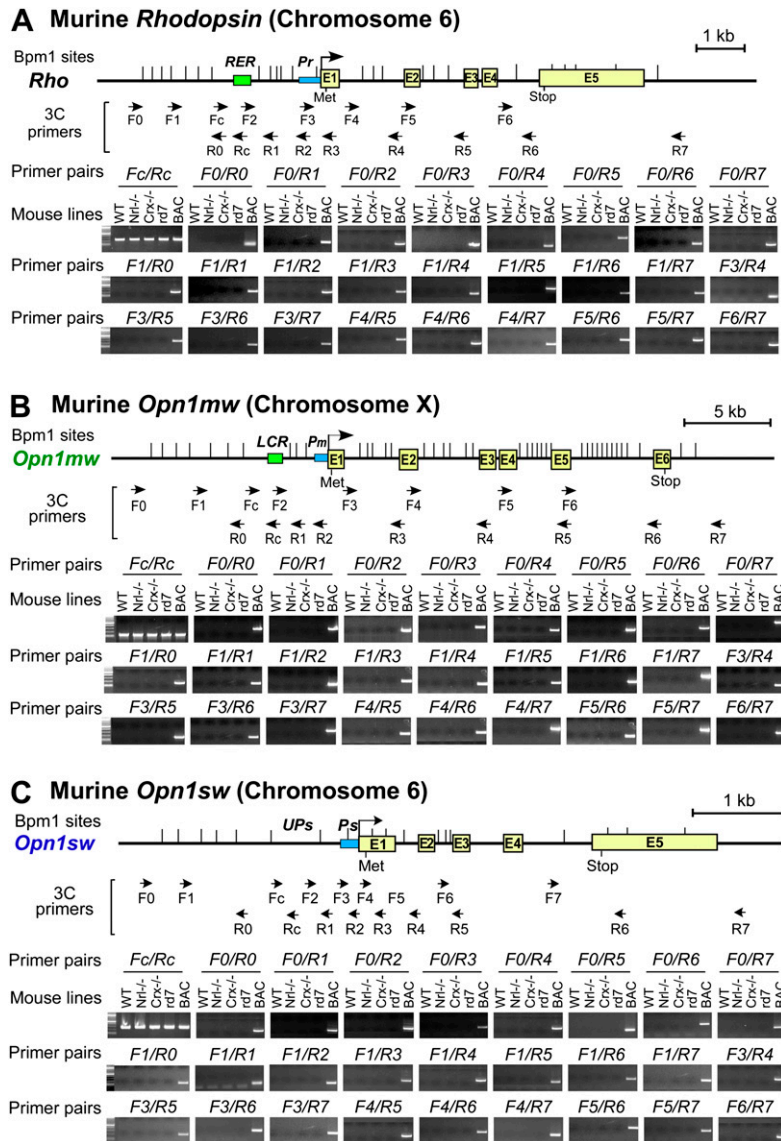

**Fig. S1.** Gel images of negative 3C results using retinas of the indicated mouse lines. (A) *Rhodopsin* (*Rho*). (B) *Opn1mw* (*M*). (C) *Opn1sw* (*S*). No chromosomal loops were detected with the indicated primer sets. The BAC sample in each set served as a positive control for PCR. A constant DNA control (Fc/Rc) amplified in parallel from each locus (see description in 3C assays in *SI Materials and Methods*) served as a genomic DNA loading control for each sample.

### A Murine *Rbp3* locus (Chromosome 14)

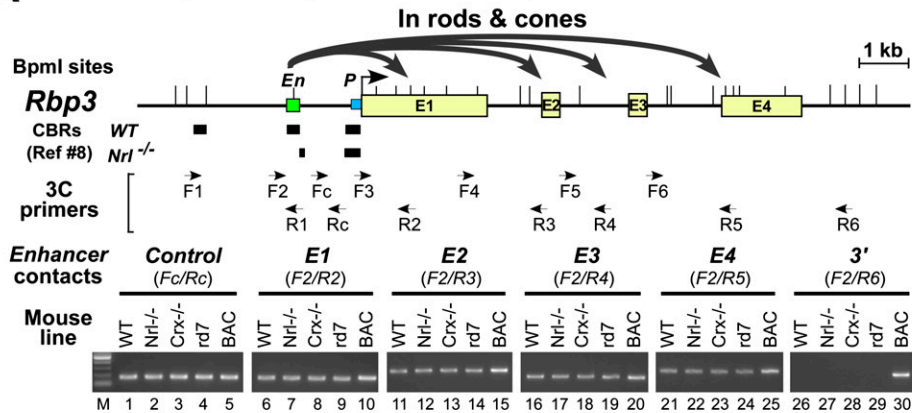

### B Murine *Gnat1* locus (Chromosome 9)

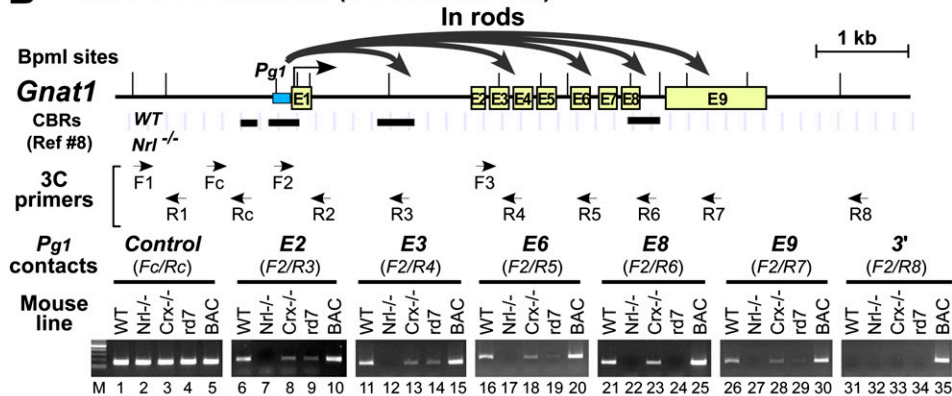

### C Murine *Gnat2* locus (Chromosome 3)

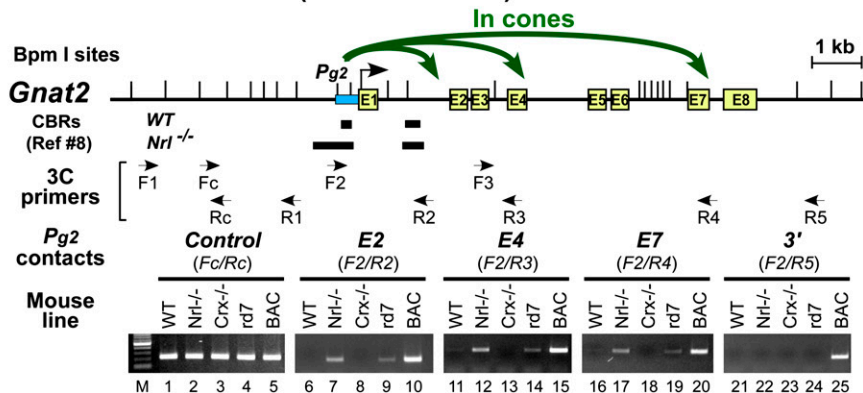

**Fig. S2.** Mouse *Rbp3*, *Gnat1*, and *Gnat2* loci exhibit intrachromosomal loops in the respective photoreceptor subtype(s) expressing them. (A) Diagram of *Rbp3* locus, showing gene structure (1, 2) and positions of CRX binding regions (CBRs) reported by Corbo et al. (3), Bpm1 restriction sites ( $\square$ ), and 3C primers. Gel images show PCR products from 3C assays on P14 retinas of the indicated mouse lines and BAC controls. *Rbp3* transcription occurs in both rods and cones and is unaffected by *Crx*<sup>-/-</sup>, *Nrl*<sup>-/-</sup>, and *rd7* mutations (4). As indicated by curved black arrows, *Rbp3* enhancer (*En*) loops with various *Rbp3* coding regions, but not 3', in WT rods, *Nrl*<sup>-/-</sup> cones, defective rods (*Crx*<sup>-/-</sup>), and rod/S-cone hybrid cells (*rd7*), consistent with *Rbp3* expression pattern in these mouse lines. (B) Diagram of *Gnat1* locus, showing gene structure and positions of CBRs reported by Corbo et al. (3), Bpm1 restriction sites ( $\square$ ), and 3C primers. Gel images show PCR products from 3C assays on P14 retinas of the indicated mouse lines and BAC controls. *Gnat1* promoter (*Pg1*) makes looping contacts with *Gnat1* coding regions in WT rods, as indicated by curved gray arrows. Weak looping signals were also detected in *Crx*<sup>-/-</sup> defective rods and *rd7* rod/S-cone hybrid cells, where *Gnat1* expression is reduced. (C) Diagram of *Gnat2* locus, showing gene structure and positions of CBRs, Bpm1 restriction sites ( $\square$ ), and 3C primers. Gel images show PCR products from 3C assays on P14 retinas of the indicated mouse lines. *Gnat2* promoter (*Pg2*) makes looping interactions with *Gnat2* coding regions in *Nrl*<sup>-/-</sup> cones but not in rods, as illustrated by curved green arrows. Weak looping signals were also detected in *rd7* hybrid cells, where *Gnat2* is partially derepressed (5).

- Fong SL, Fong WB (1999) Elements regulating the transcription of human interstitial retinoid-binding protein (IRBP) gene in cultured retinoblastoma cells. *Curr Eye Res* 18:283–291.
- Ying S, et al. (1998) A CAT reporter construct containing 277bp GAT2 promoter and 214bp IRBP enhancer is specifically expressed by cone photoreceptor cells in transgenic mice. *Curr Eye Res* 17:777–782.
- Corbo JC, et al. (2010) CRX ChIP-seq reveals the cis-regulatory architecture of mouse photoreceptors. *Genome Res* 20:1512–1525.
- Hennig AK, Peng GH, Chen S (2008) Regulation of photoreceptor gene expression by Crx-associated transcription factor network. *Brain Res* 1192:114–133.
- Chen J, Rattner A, Nathans J (2005) The rod photoreceptor-specific nuclear receptor Nr2e3 represses transcription of multiple cone-specific genes. *J Neurosci* 25:118–129.

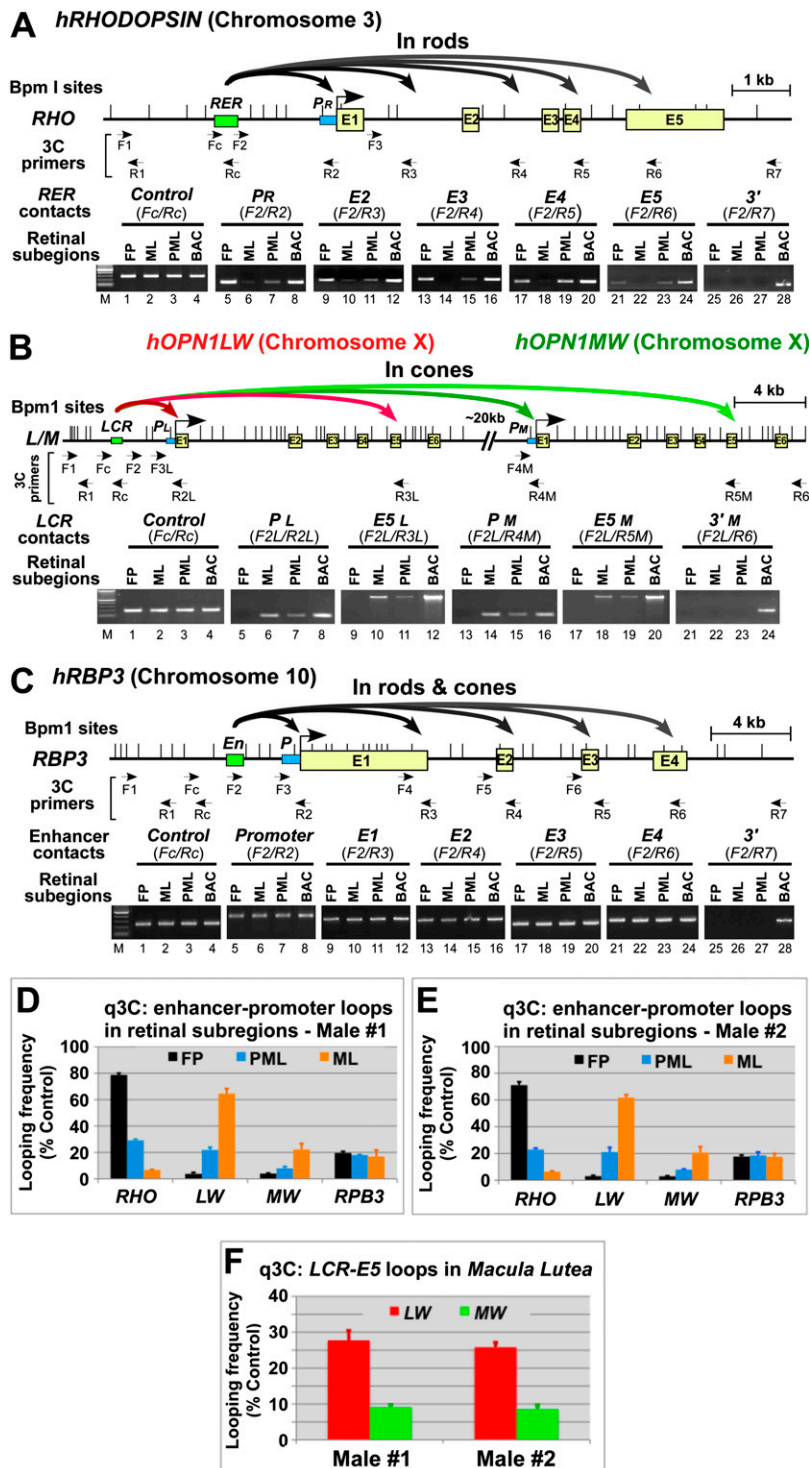

**Fig. S3.** Human *OPSIN* loci—*RHO*, *OPN1LW*, and *OPN1MW*—adopt looping organizations in the respective photoreceptor subtypes actively expressing them. (A) Human *RHO* locus, showing gene structure, Bpm1 restriction sites ( $\square$ ), 3C primers, and *Rho* enhancer region (*RER*)-organized chromosomal loops (black/gray arrows) in rods detected by 3C assays. Gel images show 3C results for the *RHO* locus in the indicated subregions of male no. 1 retinas: FP (rod-rich), ML (cone-rich), and PML (mixed rods and cones) with BAC-positive controls. The results show that *RHO* *RER* loops with the promoter ( $P_R$ ) and coding regions in rod-rich FP and, to a lesser degree, in PML samples with mixed rods and cones, but no looping was detected in cone-rich ML samples, indicating the rod origin of these loops. (B) Human *OPN1LW* (*L*) and *OPN1MW* (*M*) loci, showing gene structure, Bpm1 restriction sites ( $\square$ ), 3C primers, and *LCR*-organized chromosomal loops in cones (red and green arrows represent the loops contacting *L* and *M* regions, respectively) as detected by 3C. Gel images show 3C results from the *L/M* loci in the indicated subregions of male no. 1 retinas and BAC controls. *L/M* loops are detected in cone-rich ML samples and, to a lesser degree, in PML samples but not in rod-rich FP samples, suggesting a cone origin of these loops. (C) Human *RBP3* locus, showing gene structure (1), Bpm1 restriction sites ( $\square$ ), 3C primers, and *RBP3* enhancer-organized chromosomal loops in both rods and cones detected by 3C. Gel images show 3C results from the indicated subregions, showing *RBP3* loops are present in all subregions, consistent with the *RBP3* rod/cone expression pattern. Similar results were obtained for male no. 2. (D and E) qPCR quantification of enhancer–promoter loop frequencies (relative to controls) of four genes in the indicated subregions dissected from male donors no. 1 and no. 2,

Legend continued on following page

respectively. Note that the difference in looping frequencies between rod-rich FP and cone-rich ML samples is reversed when *Rho* is compared with *L* or *M*, whereas *RBP3* looping frequency is constant in all subregions. (F) Comparison of LCR looping frequencies between *L* (red) and *M* (green) *E5* fragments for both male no. 1 and male no. 2. Only ML samples are used for the comparison because this subregion contains the highest cone density. The 3C products from *L/M* loci of each donor were confirmed by sequencing. Both donors show a near 3:1 *L/M* looping ratio for the two fragments examined, supporting distance-dependent competition between *L* and *M* for LCR, which gives *L* advantages over *M*.

1. Fong SL, Fong WB (1999) Elements regulating the transcription of human interstitial retinoid-binding protein (IRBP) gene in cultured retinoblastoma cells. *Curr Eye Res* 18:283–291.

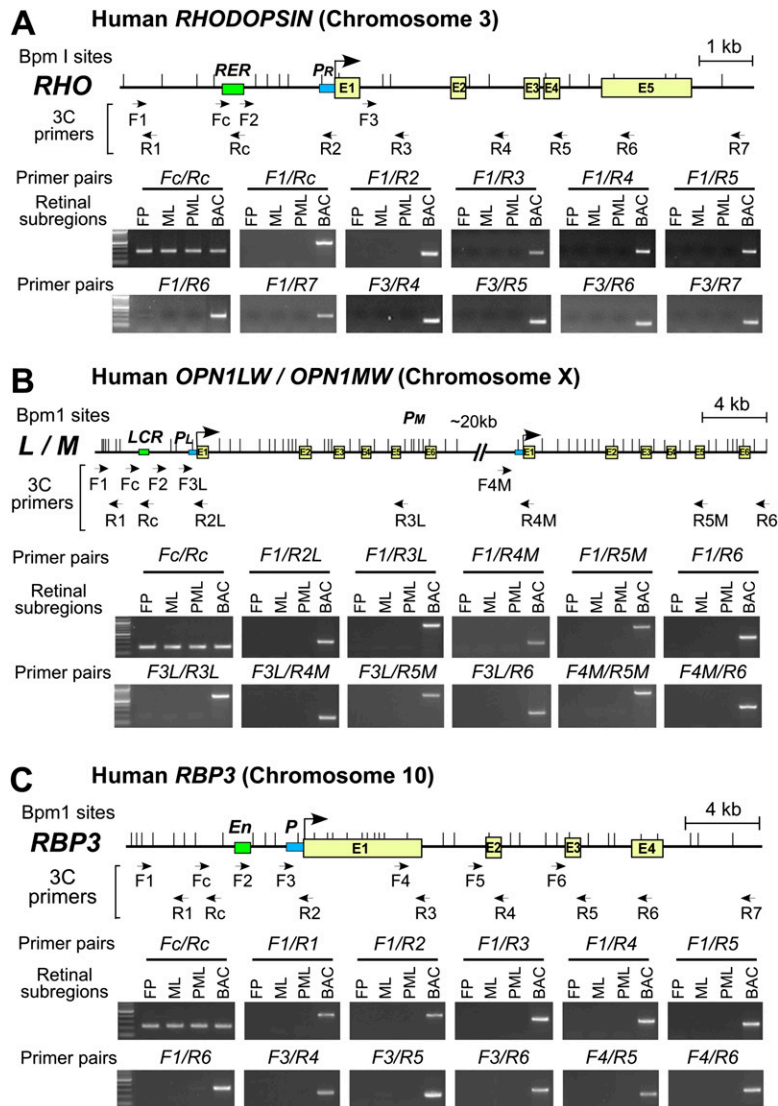

**Fig. S4.** Gel images of negative 3C results using subregions of human retinas. (A) *RHO*. (B) *OPN1LW* (*L*) and *OPN1MW* (*M*). (C) *RBP3*. FP (rod-rich), ML (cone-rich), and PML (mixed rods and cones). No chromosomal loops were detected with the indicated primer sets. The BAC sample in each set served as a positive control for PCR. A DNA segment (Fc/Rc) served as a constant DNA control for each 3C sample, as described in [SI Materials and Methods](#).

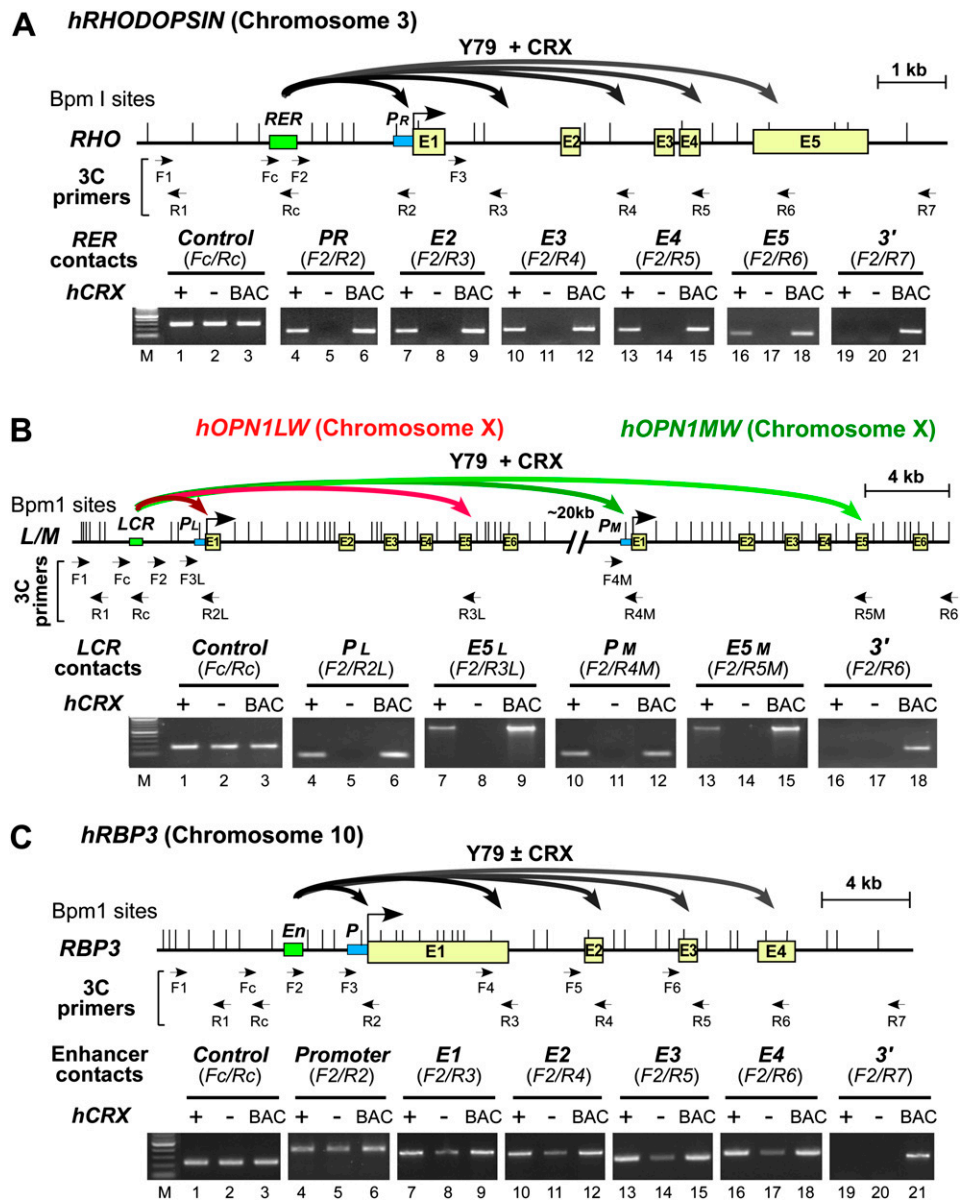

**Fig. S5.** Recombinant CRX capable of activating *OPN1* transcription induces intrachromosomal loops in Y79 retinoblastoma cells. Diagrams of human *RHO*, *OPN1LW/OPN1MW*, and *RBP3* loci, respectively, showing gene structure, Bpm1 restriction sites (|), 3C primers, and intrachromosomal loops detected by 3C in Y79 cells with the indicated treatments. Gel images of PCR products below each gene diagram show 3C results from cultured Y79 cells transiently transfected with a recombinant CRX expression vector (+CRX) or an empty vector (–CRX) and the respective BAC-positive controls (BAC). *OPN1* intrachromosomal loops were detected in CRX-transfected Y79 cells (+CRX) but not in the absence of CRX, consistent with the induction of *RHO* and *L/M* transcription reported previously (1). In contrast, *RBP3* loops were detected in the absence and presence of recombinant CRX, consistent with *RBP3* expression in these conditions (1).

1. Peng GH, Chen S (2007) Crx activates *opsin* transcription by recruiting HAT-containing co-activators and promoting histone acetylation. *Hum Mol Genet* 16:2433–2452.

Table S1. 3C primers

| Gene                   | Forward primer | Sequence (5' → 3')        | Reverse primer         | Sequence (5' → 3')        |
|------------------------|----------------|---------------------------|------------------------|---------------------------|
| Mouse                  |                |                           |                        |                           |
| Rho                    | Fc             | GCGGAGACCACGATGAAG        | Rc                     | GGGAACACAGGGCAGGTATG      |
|                        | F0             | CCATCTTGACAGTCTTGCTTG     | R0                     | AGATGCTGGATGCTGGGG        |
|                        | F1             | GTGACTGCTGAGCCAAAGTTG     | R1                     | GCTGATGGTGGGGGAAATG       |
|                        | F2             | ATGGAAGGAAGGGGGTTGC       | R2                     | TGCGACTGGAACCTTTGG        |
|                        | F3             | TCTGGCTTAGGGAGAGAAGTCT    | R3                     | TTCGTAGACAGAGACCAAGGC     |
|                        | F4             | GATTCTTGTGGTAGCACTCCTG    | R4                     | CAGTTAGTAGCCGTCACTCCTC    |
|                        | F5             | GGAGAAGAGAGGGACTGAATGG    | R5                     | CAGGAAGAGAACACACGCC       |
| <i>Opn1mw (M)</i>      | F6             | CCAAATGGTTCTGGAAGTCTGC    | R6                     | TTGGGAGAGGGGGACACAC       |
|                        | Fc             | GCTATCTCTCAGTTTTGCCTG     | R7                     | GGCTGAGTGTGTGTATGTTCC     |
|                        | F0             | CCACATACAGTAGCCAAACCG     | Rc                     | CCTTATCCACCTCCTCTTTCC     |
|                        | F1             | CACCAGAGCCTCAACATCTTG     | R0                     | TTGTGAGTGTGGTCAATGAAC     |
|                        | F2             | GGGAAAGAGGAGGTGGAATAAG    | R1                     | TTCTCTCTCCTTACCCTTTAC     |
|                        | F3             | TTCCAACCCCTTCTTCTG        | R2                     | CCCCTCTCTACCCATCAAATAC    |
|                        | F4             | GCTGCCAAACCTGATGAGC       | R3                     | CCACAAGAATCATCCAGGTGC     |
| <i>Opn1sw (S)</i>      | F5             | GGGGCTTGTTAGAGTTTCAGAG    | R4                     | CCATAGTTGCTTGTGCTCTGGAG   |
|                        | F6             | GGAGCAGGGGATTCCTTTC       | R5                     | AATGACCTGATTTGGGGGC       |
|                        | Fc             | TGGATGGGACACACACTTCC      | R6                     | CGACATTTTGTGCTGATTC       |
|                        | F0             | GCCTTCGGTTTAGTGCCAGAC     | R7                     | AACAAGTTTTGGCTCACCTGG     |
|                        | F1             | AAGTCCCCAGAGAGGCATTTC     | Rc                     | CAGCAGGCAGCAGTAAGAGAAC    |
|                        | F2             | AAACCCAAGCAGGAAGTTGC      | R0                     | CAAAGCACACATTTCAACCAAC    |
|                        | F3             | GGTCTCTGGATAGGGACACTCAG   | R1                     | TGTAAGAGAAATCAGGCTGGAAC   |
| <i>Rbp3</i>            | F4             | AGCGGGAGATGTCAAGGAGAG     | R2                     | GGTCAGTATTGGTTCTGTGGC     |
|                        | F5             | CTCAATGCCATAGTGTGGTG      | R3                     | GGGCTGTGCAACTTTTTG        |
|                        | F6             | TGCTTCTGGCATTCTTCCAAC     | R4                     | AGGAAAGCCAATGACCATCC      |
|                        | F7             | TCCTATCCCGAGTGTGGAGTC     | R5                     | GGGATGAACCTGAAAAGGACC     |
|                        | Fc             | CCTGACAGTAAGTCTGCCTATTTTC | R6                     | ACCACTCCCCATCTTTCCC       |
|                        | F1             | GGATTATGGAGTTGAGGAGTTGATG | R7                     | CAAGAAGAGGCTGAAGAGATGG    |
|                        | F2             | TCCTGGTAGTCTTACCCTCTCC    | Rc                     | TGGAAGCCATTATCTGACGATG    |
| <i>Gnat1</i>           | F3             | TGAGAACCTGATGGGAATGC      | R1                     | CTCATCCCCACTGTTTGC        |
|                        | F4             | CCAGCACCTCTACTCTGTTTTGAC  | R2                     | TGTGAGGAAGAAGTTGGACTGG    |
|                        | F5             | CCAATGTGTGTTGAGGTGAAG     | R3                     | CTAAGGAAATGGGAAGGAGTGAG   |
|                        | F6             | CCCCTCACCTGCTAATCAAATAG   | R4                     | AGAGAATGGCTGTCTGGGAG      |
|                        | Fc             | CCTGAGTGGTAGGCAAATAGTCAC  | R5                     | CCACTTGTCACTTCAAGGATG     |
|                        | F1             | AACACACACACACAACATCTG     | R6                     | TGTGCCAGTCTCAGAAGAGC      |
|                        | F2             | TGTGGAGAGCCAGTTGATTG      | R7                     | AACTTGGAGGAAGGTGGTGC      |
| <i>Gnat2</i>           | F3             | CAGAACCTGTCTTCCCTACTTG    | R1                     | CTGCACTTCAAGCCCTTGG       |
|                        | Fc             | TCCAGGGTATGTGGTCTTTG      | R2                     | CCCAGAAGCAGCAGTTTCAC      |
|                        | F1             | GCAGACTTTTCAAACCTGCCAG    | R3                     | GTCTGAGGGCAAATGTGC        |
|                        | F2             | CAGGCACAAGCAAAGTGGG       | R4                     | CATACTGAATGTTGAGCGTGG     |
|                        | F3             | GCAGCAAAGGACCTGTATCTTC    | R5                     | CGAACATTCTGTCGGGTAGAG     |
|                        | Fc             | TCCAGGGTATGTGGTCTTTG      | R6                     | GAGGTTCTCCTGATGATAATGTC   |
|                        | F1             | GCAGACTTTTCAAACCTGCCAG    | R7                     | TCAAGTCCTTCGTGGAACTG      |
| Human                  | F2             | CAGGCACAAGCAAAGTGGG       | R8                     | CAGCCAGCCCTGAGTATTG       |
|                        | F3             | GCAGCAAAGGACCTGTATCTTC    | Rc                     | TGACTCCTATTCTGCTACTGCTCTG |
|                        | Fc             | TTGTGAGCAAGACAGACCCAG     | R1                     | AACCAGAGGGAGAGGGATACAG    |
|                        | F1             | CCTGTAACCCAGCACTTTG       | R2                     | AGAGGTTGAGCCAGGGTTTC      |
|                        | F2             | GCGTTGGGCATAATCACCAG      | R3                     | CAACCTGTCTCAATGACGGTG     |
|                        | F3             | GCCTCTGTTTCCCTGGAGC       | R4                     | TTACTCACTAATGCTCCTGCTG    |
|                        | Fc             | TTGTGAGCAAGACAGACCCAG     | R5                     | CCTGGCTTTCATCAGACTGG      |
| <i>OPN1LW/MW (L/M)</i> | F1             | CCTGTAACCCAGCACTTTG       | R1                     | TGGTATTATGCCAACCG         |
|                        | F2             | GCGTTGGGCATAATCACCAG      | R2                     | CAAGCGATTCTCCTGCCTTAG     |
|                        | F3             | GCCTCTGTTTCCCTGGAGC       | R3                     | CACAAGTTACCTCTGGAGTCATCC  |
|                        | Fc             | CGTAATCCTGGACAAGGGCAG     | R4                     | CACCAGGAGACTTGAACGC       |
|                        | F1             | TCTTACCACCCTACTGTCCGC     | R5                     | TAGCAAGACTGAGGAGGAAAGG    |
|                        | F2             | TTTTGTGTCTGGCTTCGCTC      | R6                     | TCTGTGTGGTGGCTGACTCC      |
|                        | F3L*           | GGAAGCCAACAGCAGGATG       | R7                     | ATGAGTTGGGAGGAGGAGGG      |
|                        |                | Rc                        | GCAACAAAACCCACCACCG    |                           |
|                        |                | R1                        | GGGAGATAAGCAACTCTGAGGC |                           |
|                        |                | R2L*                      | CACTCTGAATGGAATGAGGAGC |                           |
|                        |                | R3L*                      | GTGGTTCTTTGAAAGCCAG    |                           |
|                        |                |                           | CAGACGCAGTACGCAAAGAT   |                           |

**Table S1. Cont.**

| Gene        | Forward primer | Sequence (5' → 3')      | Reverse primer | Sequence (5' → 3')      |
|-------------|----------------|-------------------------|----------------|-------------------------|
| <i>RBP3</i> | F4M*           | GAATGTGGCAGAAGGTGATGTC  | R4M*           | GCTGGGCTTAGTGGCAAATAC   |
|             |                |                         | R5M*           | CAGAAGCAGAATGCCAGGAC    |
|             |                |                         | R6             | GGGTTAGAGTCGCTCATTACC   |
|             | Fc             | CTCAAGCAATGGCAGACAAG    | Rc             | GGTCACATCACTCCACCGTATG  |
|             | F1             | TTGTCAGGGTCTGGATGGG     | R1             | CAGCCAATGGAAGTGAGCC     |
|             | F2             | GCATACGGTGGAGTGATGTG    | R2             | GGAAGCAGTAGTTATCCAAGAGG |
|             | F3             | CACAACACAGCAAGATAAGATGC | R3             | CAGGTCTCTTTGGGTCTCAC    |
|             | F4             | AGGACATAGTGGCTCTGCG     | R4             | TTTGACTGTCCCCTGGCAG     |
|             | F5             | TCAGAAATGTTAGTTCCTGTCCC | R5             | TACAACCTGGGCGTGTGTC     |
|             | F6             | ATACTCTGGAAAATGCCAACC   | R6             | TTTGCTGCTCCTGGGAAC      |
|             |                |                         | R7             | ATGACTCTGGCTTGCTGC      |

\*Specific to either *L* or *M* as indicated ( $\geq 6$ -bp difference).

**Table S2. Primers for sequencing human L/M LCR loops**

| Primer   | Sequence (5' → 3')    |
|----------|-----------------------|
| L/M-Prom | TCACCGCAACCTCGACCTCC  |
| L/M-E5   | TGTCTCCCTTAGGTGGCAAAG |

**Table S3. Mouse and human BAC clones**

| Gene                   | Gene ID   | BAC clone name |
|------------------------|-----------|----------------|
| Mouse                  |           |                |
| <i>Rho</i>             | 212541    | RP24-288F10    |
| <i>Opn1mw (M)</i>      | 14539     | RP23-378I14    |
| <i>Opn1sw (S)</i>      | 12057     | RP24-285P4     |
| <i>Rbp3</i>            | 19661     | RP23-377H21    |
| <i>Gnat1</i>           | 14685     | RP24-211B23    |
| <i>Gnat2</i>           | 14686     | RP24-252F10    |
| Human                  |           |                |
| <i>RHO</i>             | 6010      | RP11-26311     |
| <i>OPN1LW/MW (L/M)</i> | 5956/2652 | RP11-330B2     |
| <i>RBP3</i>            | 5949      | RP11-635L5     |



**Table S4. Predicted sizes (in base pairs) of 3C PCR products**

| Gene                   | Forward primer | Reverse primer |     |     |     |     |     |     |     |     |
|------------------------|----------------|----------------|-----|-----|-----|-----|-----|-----|-----|-----|
|                        |                | Rc             | R0  | R1  | R2  | R3  | R4  | R5  | R6  | R7  |
| Mouse                  |                |                |     |     |     |     |     |     |     |     |
| <i>Rho</i>             | Fc             | 234            |     |     |     |     |     |     |     |     |
|                        | F0             |                | 139 | 165 | 111 | 129 | 107 | 292 | 148 | 134 |
|                        | F1             |                | 258 | 284 | 230 | 248 | 206 | 411 | 267 | 253 |
|                        | F2             |                |     |     | 153 | 170 | 106 | 333 | 188 | 174 |
|                        | F3             |                |     |     |     |     | 116 | 281 | 137 | 123 |
|                        | F4             |                |     |     |     |     |     | 320 | 177 | 162 |
|                        | F5             |                |     |     |     |     |     |     | 297 | 284 |
| <i>Opn1mw (M)</i>      | F6             |                |     |     |     |     |     |     |     | 131 |
|                        | Fc             | 125            |     |     |     |     |     |     |     |     |
|                        | F0             |                | 288 | 287 | 275 | 331 | 270 | 282 | 310 | 508 |
|                        | F1             |                | 154 | 153 | 141 | 198 | 137 | 149 | 176 | 374 |
|                        | R2             |                |     |     | 218 | 275 | 214 | 226 | 253 | 451 |
|                        | R3             |                |     |     |     |     | 104 | 115 | 142 | 340 |
|                        | F4             |                |     |     |     |     |     | 242 | 280 | 478 |
| <i>Opn1sw (S)</i>      | F5             |                |     |     |     |     |     | 195 | 394 |     |
|                        | F6             |                |     |     |     |     |     |     |     | 293 |
|                        | Fc             | 245            |     |     |     |     |     |     |     |     |
|                        | F0             |                | 174 | 179 | 192 | 263 | 245 | 206 | 334 | 242 |
|                        | F1             |                | 154 | 148 | 168 | 239 | 221 | 182 | 310 | 218 |
|                        | F2             |                |     |     | 240 | 311 | 293 | 254 | 384 | 290 |
|                        | F3             |                |     |     |     |     | 211 | 172 | 301 | 208 |
| <i>Rbp3</i>            | F4             |                |     |     |     |     | 150 | 278 | 186 |     |
|                        | F5             |                |     |     |     |     |     | 381 | 288 |     |
|                        | F6             |                |     |     |     |     |     |     |     | 135 |
|                        | Fc             | 173            |     |     |     |     |     |     |     |     |
|                        | F1             |                | 228 | 173 | 284 | 184 | 266 | 234 |     |     |
|                        | F2             |                |     | 168 | 280 | 180 | 262 | 230 |     |     |
|                        | F3             |                |     |     | 296 | 190 | 272 | 240 |     |     |
| <i>Gnat1</i>           | F4             |                |     |     |     | 288 | 372 | 340 |     |     |
|                        | F5             |                |     |     |     |     | 310 | 277 |     |     |
|                        | F6             |                |     |     |     |     |     | 162 |     |     |
|                        | Fc             | 163            |     |     |     |     |     |     |     |     |
|                        | F1             |                | 152 | 101 | 163 | 136 | 186 | 159 | 171 | 168 |
|                        | F2             |                |     |     | 220 | 193 | 243 | 216 | 228 | 224 |
|                        | F3             |                |     |     |     |     | 234 | 207 | 219 | 215 |
| <i>Gnat2</i>           | Fc             | 156            |     |     |     |     |     |     |     |     |
|                        | F1             |                | 138 | 160 | 217 | 235 | 210 |     |     |     |
|                        | F2             |                |     | 198 | 255 | 273 | 248 |     |     |     |
|                        | F3             |                |     |     |     | 324 | 299 |     |     |     |
| Human                  |                |                |     |     |     |     |     |     |     |     |
| <i>RHO</i>             | Fc             | 289            |     |     |     |     |     |     |     |     |
|                        | F1             | 566            | 181 | 245 | 263 | 275 | 270 | 250 | 265 |     |
|                        | F2             |                |     | 181 | 199 | 211 | 206 | 186 | 201 |     |
| <i>OPN1LW/MW (L/M)</i> | F3             |                |     |     |     | 173 | 168 | 148 | 163 |     |
|                        | Fc             | 197            |     |     |     |     |     |     |     |     |
|                        | F1             |                | 160 | 303 | 835 | 296 | 829 | 390 |     |     |
|                        | F2             |                |     | 125 | 656 | 116 | 656 | 211 |     |     |
|                        | F3L            |                |     |     | 702 | 162 | 702 | 257 |     |     |
| <i>RBP3</i>            | F4M            |                |     |     |     |     | 796 | 351 |     |     |
|                        | Fc             | 224            |     |     |     |     |     |     |     |     |
|                        | F1             |                | 464 | 433 | 342 | 312 | 259 | 343 | 323 |     |
|                        | F2             |                |     | 449 | 358 | 328 | 275 | 359 | 339 |     |
|                        | F3             |                |     |     |     | 276 | 223 | 307 | 287 |     |
| F4                     |                |                |     |     |     | 210 | 294 | 274 |     |     |

**Table S5. ChIP primers (mouse)**

| Gene              | Region            | Forward (5' → 3')      | Reverse (5' → 3')        |                         |
|-------------------|-------------------|------------------------|--------------------------|-------------------------|
| <i>Rho</i>        | 5'a               | TCGTTTTTCATCAGTGTCTGCG | TCCTGGGCTCCAAGCACAAG     |                         |
|                   | 5'b               | GTGACTGCTGAGCCAAAGTTG  | GCTGAGGACGCTGTATTCAAGC   |                         |
|                   | RER               | CCAGGGTCAGAATCAGAACC   | GCAGGTGTCTTGTGGGAAC      |                         |
|                   | Pr                | GGGGCAGACAAGATGAGACAC  | TTCGTAGACAGAGACCAAGGC    |                         |
|                   | CR1               | TCTGTTTTGGCACACGGG     | AGCGGAAGTTGCTCATCGG      |                         |
|                   | CR2               | TGGGCGTGTGTTCTCTCC     | CCTGCTCATACCTCCTTGACTG   |                         |
|                   | CR3               | AATGCCACTTGACAATACCCC  | ATTCTTGCCGACAGCACAGC     |                         |
|                   | 3' UTR            | CCTTAGGACTGAGAAAGCATCG | CCTGGAAGTGTGCCACTTG      |                         |
|                   | 3'                | CTGTGGCTTGAAAGTAGGAGTC | GGTCTTGGTGGATGGATGTC     |                         |
|                   | <i>Opn1mw (M)</i> | 5'a                    | TGGACATCAATGGGAAGAGC     | TTTCTGGGTCTGTGTTACCTCAC |
| 5'b               |                   | TTGTGTGTTCTTTGCTGGGG   | TAGGGAGTTTGTGTGAGAGTATG  |                         |
| LCR               |                   | CTCAGTTTTGCCCTGCCTG    | TCTCTCCTCCTCACCCTTTAC    |                         |
| Pm                |                   | TGAGCACCCCTGTGGATTG    | GGAACCTGTCAGACTTGGCAC    |                         |
| CR1               |                   | AGGTGAACAGACACTGGACCAC | CACAGGTGCCAAAACCATCC     |                         |
| CR2               |                   | CAGAGACCATTATTGCCAGCAC | TGAACACCATTGTGAACCCC     |                         |
| CR3               |                   | CATTTCTGGGAGAGATGGC    | CAGTCTGACCTCCACACTTGG    |                         |
| CR4               |                   | TGTAGGCAACTCTGAGGCACAC | CGGAGGCAAGTGGATTCTG      |                         |
| CR5               |                   | CTGAGTTTTCCCATCCAC     | TTCTGTCTTGGAGGTGCTGG     |                         |
| 3'                |                   | TTCGGGTGAATGGCACTTC    | ATTGGGCTTGGGACTTTGG      |                         |
| <i>Opn1sw (S)</i> |                   | 5'a                    | ACGACACGACCACCAGTCCTTC   | GTCCTGCTGCCCTGATTAG     |
|                   |                   | 5'b                    | GTTTGCTGCTCTGATAAAGGACTG | CACTCTCGTTCTTGGGAATGC   |
|                   |                   | UPs                    | CCAGCCTGATTCTCTTACACC    | TGCTTCTCCAGACTATGTGAG   |
|                   | Ps                | CACTCATCCTCTTCTGTTCC   | GGTCAGATTGGTTTCTGTGGC    |                         |
|                   | CR1               | GGACCCCACTCAATGCCATAG  | TAGCCCAGGTTGCCTTCAG      |                         |
|                   | CR2               | GGTCTGGCTACTTGGATTATTG | GAGAAGTGAAGAATGGGCTTAG   |                         |
|                   | CR3               | CATTCCTCTTCCCTCATCTGC  | ACAGCGTTTTCACTCCCC       |                         |
|                   | CR4               | CTCCTGTGTCTACAACCCATC  | TGTGCCTACCAAGAGCATCC     |                         |
|                   | 3' UTR            | TAGCAGCAAACACAACGCC    | CCCTTCTCTACAGTTCTCCAG    |                         |
|                   | 3'                | TTACACCTGCTGCTCTGG     | CCCTCACACTTAGTCTTTGC     |                         |

CR, coding region.
